# Supplementary material for: General Framework for the Optimization of the Human-Robot Collaboration Decision-Making Process Through the Ability to Change Performance Metrics
Source: Frontiers journal article supplement (doi:10.3389/frobt.2021.736644), 2021-10-25
Supplement: Data_Sheet_1.pdf [file Data_Sheet_1.pdf]

## Supplementary Material

### 1 PERFORMANCE METRICS

We present, in Table S1, the performance metrics used for the evaluation of the Human-Robot Collaboration (HRC) classified based on the task types. We define each metric according to its usage in the different task types. We also introduce some common metrics used for evaluating HRC in general rather than the performance of a specific task.

### 2 IMPLEMENTATION OF THE CONDUCTED EXPERIMENTS

In figure S1, we present a block diagram of our implementation of the conducted experiments. First, the participant finishes their turn. Then, it is the turn of the robot which will be mainly made up of three parts:

- Perception: Nao's camera captures the markers, then using the Aruco library (Garrido-Jurado et al., 2014), we can estimate the pose of the cubes. This allows us to compute the state of the puzzle and to identify the human action.
- Decision-making process: The robot chooses its action according to the human's one. The utility function calculates a utility for each of the robot's actions. The robot chooses, based on the Nash equilibrium, the action that has the highest utility. This is illustrated in Figure 6 of the main paper.
- Robot's action: If the robot passes its turn ( $A_{r,w}$ ), it tells the human. In this case, the robot does not have to make any movement. On the contrary, if the robot corrects the human's action ( $A_{r,c}$ ) or helps them by indicating where to place a cube ( $A_{r,g}$ ), the robot will have to speak and move its arm to point out the cube to move.

### 3 ENTIRE EXAMPLE OF A SIMULATED TEST ON THE ASSEMBLY TASK

In the main paper, we presented the best-simulated results for illustrating the percentage of the time improvement and the percentage of the reduction of the number of human errors. In this section, we want to present both results for the same simulated test as an example. We consider a 3-cube puzzle with a ratio of the time taken by each agent (the human  $h$  and the robot  $r$ ) to make an action equals to:  $t_{A_h}/t_{A_r} = 1/3$ . This ratio is the same as the one we had while doing the real experiment with Nao and a human participant. We define  $P(A_{h,g}) = I_1$  as the probability that the human does the good action,  $P(A_{h,w}) = I_2$  as the probability that the human is passing their turn and,  $I_3 = 1 - (I_1 + I_2)$  as the probability that the human makes an error.

We note from Figure S2 that the percentage of the time improvement using our utility function ( $C_3$ ) instead of the state-of-the-art one ( $C_1$ ) for this puzzle is up to 40%. From Figure S3, the percentage of human errors reduction for the same puzzle is up to 27.9%. In both figures, each dotted line is equivalent to a specific  $I_1$  value. Each dot corresponds to a  $I_2$  value (read on the x-axis). For each dot knowing  $I_1$  and  $I_2$ , we can deduce its  $I_3$  value using  $I_3 = 1 - (I_1 + I_2)$ .

We have performed a lot of simulated tests, the results of which can be found on: [https://github.com/MelodieDANIEL/Optimizing\\_Human\\_Robot\\_Collaboration\\_Frontiers](https://github.com/MelodieDANIEL/Optimizing_Human_Robot_Collaboration_Frontiers).

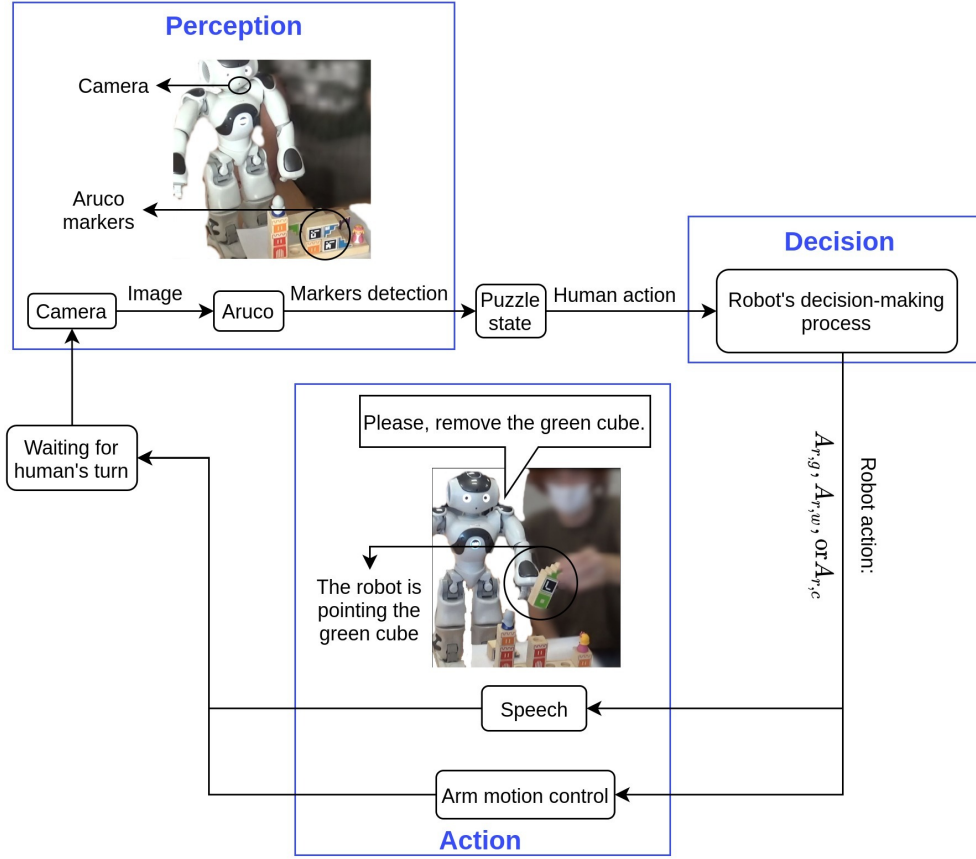

**Figure S1.** Implementation of the conducted experiments using ROS

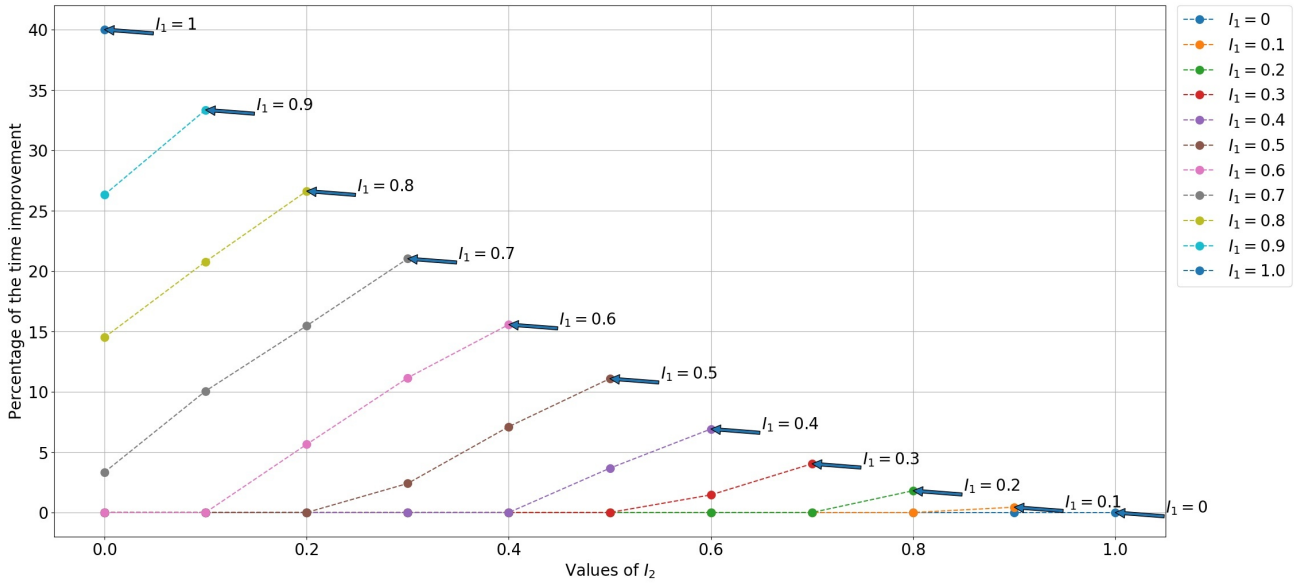

**Figure S2.** Percentage of time improvement between  $C_3$  and  $C_1$  for a 3-cube puzzle.  $t_{A_h} = \{15, 0, 15\}$  and  $t_{A_r} = \{45, 0, 45\}$ , so the ratio  $t_{A_h}/t_{A_r} = 1/3$ .

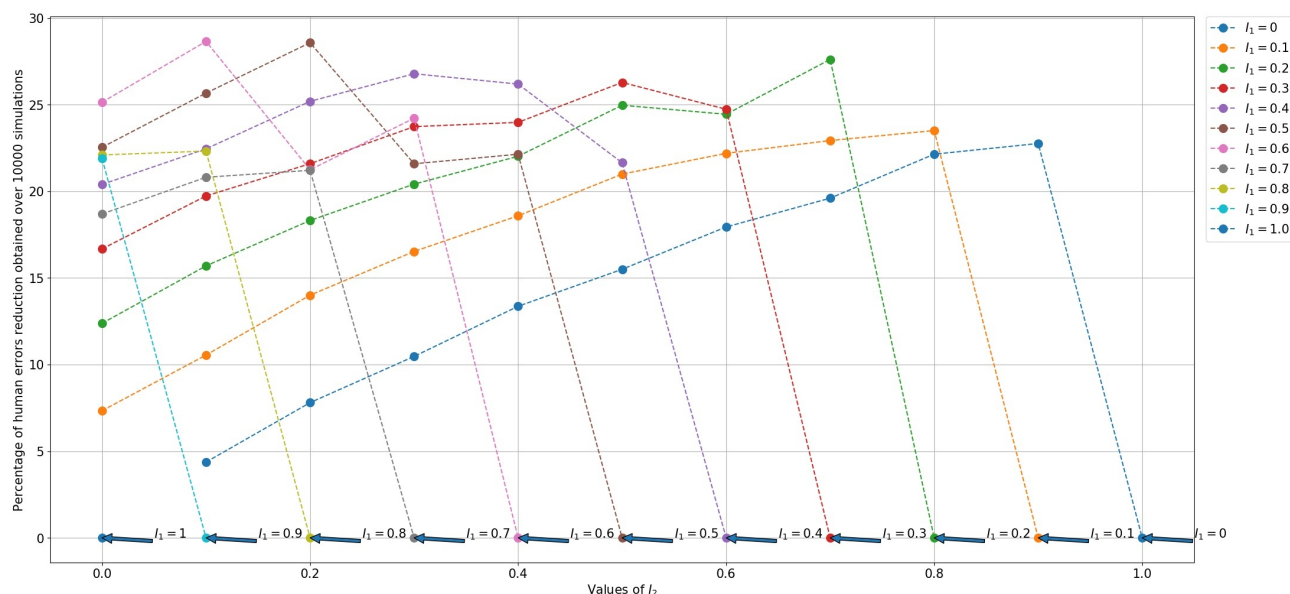

**Figure S3.** Percentage of human errors reduction between the predicted probability of human errors and the measured one for a 3-cube puzzle.  $t_{A_h} = \{15, 0, 15\}$  and  $t_{A_r} = \{45, 0, 45\}$ , so the ratio  $t_{A_h}/t_{A_r} = 1/3$ .

## 4 RESULTED TABLE OF SIMULATION TESTS

In this section, we present the resulted table (Table S2) of the percentage of the time improvement and the reduction of the number of human errors for all the figures presented in the main paper and the supplementary material.

## 5 COMPUTATION AND EXECUTION TIME OF THE TESTS

Table S3 presents all the computation and execution times of the experiments in real and in simulation. As we can notice, the average computation time of our decision-making framework is 0.5s. This computation time is suitable for the targeted real tasks on which we want to apply this framework.

## REFERENCES

- Bütepage, J. and Kragic, D. (2017). Human-robot collaboration: from psychology to social robotics. *arXiv preprint arXiv:1705.10146*
- Garrido-Jurado, S., Muñoz-Salinas, R., Madrid-Cuevas, F. J., and Marín-Jiménez, M. J. (2014). Automatic generation and detection of highly reliable fiducial markers under occlusion. *Pattern Recognition* 47, 2280–2292
- Nelles, J., Kwee-Meier, S. T., and Mertens, A. (2018). Evaluation metrics regarding human well-being and system performance in human-robot interaction—a literature review. In *Congress of the International Ergonomics Association* (Florence, Italy, August 26–30: Springer), 124–135
- Steinfeld, A., Fong, T., Kaber, D., Lewis, M., Scholtz, J., Schultz, A., et al. (2006). Common metrics for human-robot interaction. In *Proceedings of the 1st ACM SIGCHI/SIGART conference on Human-robot interaction* (Salt Lake City, Utah, USA, March 2–3), 33–40

| Task           | Performance metrics                  | Definition or usability                                                                                                                                                                                                   |
|----------------|--------------------------------------|---------------------------------------------------------------------------------------------------------------------------------------------------------------------------------------------------------------------------|
| Navigation     | Failure rate                         | Percentage of navigation tasks completion failure                                                                                                                                                                         |
|                | Accuracy                             | The accuracy of the navigation                                                                                                                                                                                            |
|                | Ergonomy or posture                  | Human ergonomics or posture                                                                                                                                                                                               |
|                | Time to completion                   | The time needed to complete the task                                                                                                                                                                                      |
|                | Rapidity                             | The time needed by the robot to adapt itself to the human or vice-versa                                                                                                                                                   |
| Perception     | Velocity                             | The speed of the perception of the robot                                                                                                                                                                                  |
|                | Accuracy                             | The accuracy of the navigation                                                                                                                                                                                            |
|                | Time to completion                   | The time needed to complete the task                                                                                                                                                                                      |
|                | Fluency                              | The fluency of the perception                                                                                                                                                                                             |
|                | Effectiveness                        | Percentage of the success of the robot's perception                                                                                                                                                                       |
|                | Number of errors                     | The number of failures in the robot's perception                                                                                                                                                                          |
| Management     | Time delivery                        | The time needed to deliver the request from the robot to the human                                                                                                                                                        |
|                | Time request                         | The time needed by the human (operator) to notice the request                                                                                                                                                             |
|                | Number of human errors               | The number of times the human cannot identify the situation with awareness                                                                                                                                                |
|                | Number of robot errors               | The number of times the robot is misinterpreting human desires                                                                                                                                                            |
|                | Trust                                | Trust of the human in the robot                                                                                                                                                                                           |
|                | Number of actions                    | The number of actions needed to accomplish the task from the human and the robot                                                                                                                                          |
|                | Cognitive load                       | The workload required for the human to adapt to the robot                                                                                                                                                                 |
| Manipulation   | Positional accuracy                  | The accuracy of the position reached by the robot                                                                                                                                                                         |
|                | Positional repeatability             | The repeatability of the robot to reach the same position                                                                                                                                                                 |
|                | Velocity                             | The speed of the robot to do the manipulation                                                                                                                                                                             |
|                | Time to completion                   | The time needed to complete the task                                                                                                                                                                                      |
|                | Rapidity                             | The time needed by the robot to adapt itself to the human or vice-versa                                                                                                                                                   |
|                | Cognitive load                       | The workload required for the human to adapt to the robot                                                                                                                                                                 |
|                | Ergonomy or posture                  | Human ergonomics or posture                                                                                                                                                                                               |
|                | Dexterity                            | The robot's dexterity in doing the manipulation                                                                                                                                                                           |
|                | Effort or force                      | The physical effort (or force) that the human must provide to perform the manipulation                                                                                                                                    |
|                | Number of human errors               | The number of times the human cannot identify the situation with awareness                                                                                                                                                |
|                | Number of robot errors               | The number of times the robot is misinterpreting human desires                                                                                                                                                            |
|                | Number of actions                    | The number of actions needed to accomplish the task from the human and the robot                                                                                                                                          |
| Social         | Persuasiveness                       | The ability of the robot to persuade the human about something                                                                                                                                                            |
|                | Trust                                | Trust of the human in the robot                                                                                                                                                                                           |
|                | Engagement in social characteristics | Engagement in social characteristics such as emotion, dialogue, personality. The engagement can be measured through the robot's acquisition time for capturing human attention and the duration of holding human interest |
|                | Compliance                           | The compliance of the robot in appearance, adherence to norms, etc.                                                                                                                                                       |
| Common metrics | Effectiveness                        | The percentage of the mission that was accomplished with the designed autonomy                                                                                                                                            |
|                | Time to completion                   | The time needed to complete the task                                                                                                                                                                                      |
|                | Number of human errors               | The number of times the human cannot identify the situation with awareness                                                                                                                                                |
|                | Number of robot errors               | The number of times the robot is misinterpreting human desires                                                                                                                                                            |
|                | Number of actions                    | The number of actions needed to accomplish the task from the human and the robot                                                                                                                                          |
|                | Cognitive load                       | The workload required for the human to adapt to the robot                                                                                                                                                                 |
|                | Self-awareness                       | The robot knows its accuracy                                                                                                                                                                                              |
|                | Autonomy                             | The robot autonomy                                                                                                                                                                                                        |

**Table S1.** Some metrics considered for the evaluation of HRC classified based on the task types (Steinfeld et al., 2006; Bütetpage and Kragic, 2017; Nelles et al., 2018)

| $I_1, I_2, \text{ and } I_3 \text{ values}$    | Percentage of time improvement |                | Percentage of human errors reduction |               |
|------------------------------------------------|--------------------------------|----------------|--------------------------------------|---------------|
|                                                | Figure 6 (main paper)          | Figure S2      | Figure 7 (main paper)                | Figure S3     |
| $I_1 = 0, I_2 = 0.1, \text{ and } I_3 = 0.9$   | 0.0                            | 0.0            | 7.09412331431                        | 4.37067607062 |
| $I_1 = 0, I_2 = 0.2, \text{ and } I_3 = 0.8$   | 0.0                            | 0.0            | 12.6336858252                        | 7.8020796966  |
| $I_1 = 0, I_2 = 0.3, \text{ and } I_3 = 0.7$   | 0.0                            | 0.0            | 16.556882222                         | 10.4704561576 |
| $I_1 = 0, I_2 = 0.4, \text{ and } I_3 = 0.6$   | 0.0                            | 0.0            | 19.2303631915                        | 13.3638679771 |
| $I_1 = 0, I_2 = 0.5, \text{ and } I_3 = 0.5$   | 0.0                            | 0.0            | 22.3643444888                        | 15.4993421616 |
| $I_1 = 0, I_2 = 0.6, \text{ and } I_3 = 0.4$   | 0.0                            | 0.0            | 24.8542177267                        | 17.9408050283 |
| $I_1 = 0, I_2 = 0.7, \text{ and } I_3 = 0.3$   | 0.0                            | 0.0            | 28.4374851075                        | 19.6044166944 |
| $I_1 = 0, I_2 = 0.8, \text{ and } I_3 = 0.2$   | 0.0                            | 0.0            | 31.2453571429                        | 22.1412554113 |
| $I_1 = 0, I_2 = 0.9, \text{ and } I_3 = 0.1$   | 0.0                            | 0.0            | 29.2866666667                        | 22.7585714286 |
| $I_1 = 0, I_2 = 1, \text{ and } I_3 = 0$       | 0.0                            | 0.0            | 0.0                                  | 0.0           |
| $I_1 = 0.1, I_2 = 0, \text{ and } I_3 = 0.9$   | 0.0                            | 0.0            | 17.5302972429                        | 7.33482163197 |
| $I_1 = 0.1, I_2 = 0.1, \text{ and } I_3 = 0.8$ | 0.0                            | 0.0            | 19.2143318311                        | 10.5479301203 |
| $I_1 = 0.1, I_2 = 0.2, \text{ and } I_3 = 0.7$ | 0.0                            | 0.0            | 21.3374721068                        | 14.0052043345 |
| $I_1 = 0.1, I_2 = 0.3, \text{ and } I_3 = 0.6$ | 0.0                            | 0.0            | 23.5786203979                        | 16.5280674286 |
| $I_1 = 0.1, I_2 = 0.4, \text{ and } I_3 = 0.5$ | 0.0                            | 0.0            | 26.7249188197                        | 18.5858323843 |
| $I_1 = 0.1, I_2 = 0.5, \text{ and } I_3 = 0.4$ | 0.0                            | 0.0            | 27.5937682456                        | 20.9918095099 |
| $I_1 = 0.1, I_2 = 0.6, \text{ and } I_3 = 0.3$ | 0.0                            | 0.0            | 28.9937657713                        | 22.1913226588 |
| $I_1 = 0.1, I_2 = 0.7, \text{ and } I_3 = 0.2$ | 0.0                            | 0.0            | 32.0019444444                        | 22.9278030303 |
| $I_1 = 0.1, I_2 = 0.8, \text{ and } I_3 = 0.1$ | 0.0                            | 0.0            | 34.205                               | 23.5061904762 |
| $I_1 = 0.1, I_2 = 0.9, \text{ and } I_3 = 0$   | 0.646808142428                 | 0.441773745339 | 0.0                                  | 0.0           |
| $I_1 = 0.2, I_2 = 0, \text{ and } I_3 = 0.8$   | 0.0                            | 0.0            | 25.4460206798                        | 12.376411145  |
| $I_1 = 0.2, I_2 = 0.1, \text{ and } I_3 = 0.7$ | 0.0                            | 0.0            | 25.6904326925                        | 15.6962303954 |
| $I_1 = 0.2, I_2 = 0.2, \text{ and } I_3 = 0.6$ | 0.0                            | 0.0            | 27.5106709889                        | 18.315465336  |
| $I_1 = 0.2, I_2 = 0.3, \text{ and } I_3 = 0.5$ | 0.0                            | 0.0            | 30.0794412809                        | 20.4125719276 |
| $I_1 = 0.2, I_2 = 0.4, \text{ and } I_3 = 0.4$ | 0.0                            | 0.0            | 30.8272285354                        | 22.0221180209 |
| $I_1 = 0.2, I_2 = 0.5, \text{ and } I_3 = 0.3$ | 0.0                            | 0.0            | 31.9211207311                        | 24.9664681615 |
| $I_1 = 0.2, I_2 = 0.6, \text{ and } I_3 = 0.2$ | 0.0                            | 0.0            | 34.119047619                         | 24.4444642857 |
| $I_1 = 0.2, I_2 = 0.7, \text{ and } I_3 = 0.1$ | 0.765528401311                 | 0.0            | 0.0                                  | 27.6111904762 |
| $I_1 = 0.2, I_2 = 0.8, \text{ and } I_3 = 0$   | 2.4788012545                   | 1.80659141302  | 0.0                                  | 0.0           |
| $I_1 = 0.3, I_2 = 0, \text{ and } I_3 = 0.7$   | 0.0                            | 1.91789786313  | 30.2540826341                        | 16.6733556418 |
| $I_1 = 0.3, I_2 = 0.1, \text{ and } I_3 = 0.6$ | 0.0                            | 0.0            | 30.7411696561                        | 19.7313028361 |
| $I_1 = 0.3, I_2 = 0.2, \text{ and } I_3 = 0.5$ | 0.0                            | 0.0            | 31.3673661689                        | 21.5925174216 |
| $I_1 = 0.3, I_2 = 0.3, \text{ and } I_3 = 0.4$ | 0.0                            | 0.0            | 33.7247655123                        | 23.7318043068 |
| $I_1 = 0.3, I_2 = 0.4, \text{ and } I_3 = 0.3$ | 0.0                            | 0.0            | 34.3449001924                        | 23.9794936545 |
| $I_1 = 0.3, I_2 = 0.5, \text{ and } I_3 = 0.2$ | 0.0                            | 0.0            | 36.4016269841                        | 26.2835119048 |
| $I_1 = 0.3, I_2 = 0.6, \text{ and } I_3 = 0.1$ | 2.77628815301                  | 1.46088929863  | 36.7869047619                        | 24.7346428571 |
| $I_1 = 0.3, I_2 = 0.7, \text{ and } I_3 = 0$   | 5.6292792232                   | 4.03759880367  | 0.0                                  | 0.0           |
| $I_1 = 0.4, I_2 = 0, \text{ and } I_3 = 0.6$   | 0.0                            | 0.0            | 36.3891268668                        | 20.3970746112 |
| $I_1 = 0.4, I_2 = 0.1, \text{ and } I_3 = 0.5$ | 0.0                            | 0.0            | 35.2710778111                        | 22.4513601676 |
| $I_1 = 0.4, I_2 = 0.2, \text{ and } I_3 = 0.4$ | 0.0                            | 0.0            | 35.8305131674                        | 25.1917275086 |
| $I_1 = 0.4, I_2 = 0.3, \text{ and } I_3 = 0.3$ | 0.0                            | 0.0            | 36.4988095238                        | 26.7846236171 |
| $I_1 = 0.4, I_2 = 0.4, \text{ and } I_3 = 0.2$ | 2.97937356761                  | 0.0            | 37.8678571429                        | 26.1883928571 |
| $I_1 = 0.4, I_2 = 0.5, \text{ and } I_3 = 0.1$ | 6.8298290148                   | 3.67128494973  | 35.0916666667                        | 21.646547619  |
| $I_1 = 0.4, I_2 = 0.6, \text{ and } I_3 = 0$   | 10.0581040567                  | 6.91767350379  | 0.0                                  | 0.0           |
| $I_1 = 0.5, I_2 = 0, \text{ and } I_3 = 0.5$   | 0.0                            | 0.0            | 38.5427888223                        | 22.5377313961 |
| $I_1 = 0.5, I_2 = 0.1, \text{ and } I_3 = 0.4$ | 0.0                            | 0.0            | 39.8677200577                        | 25.6673357198 |
| $I_1 = 0.5, I_2 = 0.2, \text{ and } I_3 = 0.3$ | 2.5889362939                   | 0.0            | 40.2805687831                        | 28.5753607504 |
| $I_1 = 0.5, I_2 = 0.3, \text{ and } I_3 = 0.2$ | 7.56507185318                  | 2.4071413430   | 38.0336309524                        | 21.5879166667 |
| $I_1 = 0.5, I_2 = 0.4, \text{ and } I_3 = 0.1$ | 12.187798206                   | 7.11099379702  | 41.565                               | 22.1403571429 |
| $I_1 = 0.5, I_2 = 0.5, \text{ and } I_3 = 0$   | 15.7060720797                  | 11.0874137267  | 0.0                                  | 0.0           |
| $I_1 = 0.6, I_2 = 0, \text{ and } I_3 = 0.4$   | 0.0                            | 0.0            | 41.0730555556                        | 25.1399181374 |
| $I_1 = 0.6, I_2 = 0.1, \text{ and } I_3 = 0.3$ | 8.17205250781                  | 0.0            | 42.012965368                         | 28.6511640212 |
| $I_1 = 0.6, I_2 = 0.2, \text{ and } I_3 = 0.2$ | 14.1780122742                  | 5.64235894103  | 43.109047619                         | 21.2425054113 |
| $I_1 = 0.6, I_2 = 0.3, \text{ and } I_3 = 0.1$ | 18.8995795602                  | 11.1593671564  | 45.3266666667                        | 24.2171428571 |
| $I_1 = 0.6, I_2 = 0.4, \text{ and } I_3 = 0$   | 23.2260934025                  | 15.568227852   | 0.0                                  | 0.0           |
| $I_1 = 0.7, I_2 = 0, \text{ and } I_3 = 0.3$   | 17.2439908187                  | 3.33567251462  | 44.296547619                         | 18.6905624931 |
| $I_1 = 0.7, I_2 = 0.1, \text{ and } I_3 = 0.2$ | 22.4988118634                  | 10.0605063426  | 45.0121428571                        | 20.8104816017 |
| $I_1 = 0.7, I_2 = 0.2, \text{ and } I_3 = 0.1$ | 27.4951742932                  | 15.4641925539  | 43.6866666667                        | 21.2117857143 |
| $I_1 = 0.7, I_2 = 0.3, \text{ and } I_3 = 0$   | 31.8854548846                  | 21.023549533   | 0.0                                  | 0.0           |
| $I_1 = 0.8, I_2 = 0, \text{ and } I_3 = 0.2$   | 33.0590564877                  | 14.5036859249  | 44.6876190476                        | 22.0960714286 |
| $I_1 = 0.8, I_2 = 0.1, \text{ and } I_3 = 0.1$ | 37.9880475163                  | 20.7778656126  | 45.2483333333                        | 22.3210714286 |
| $I_1 = 0.8, I_2 = 0.2, \text{ and } I_3 = 0$   | 41.9390153589                  | 26.6215414675  | 0.0                                  | 0.0           |
| $I_1 = 0.9, I_2 = 0, \text{ and } I_3 = 0.1$   | 49.8353835563                  | 26.317921026   | 50.5583333333                        | 21.8939285714 |
| $I_1 = 0.9, I_2 = 0.1, \text{ and } I_3 = 0$   | 53.3069306931                  | 33.3469782673  | 0.0                                  | 0.0           |
| $I_1 = 1, I_2 = 0, \text{ and } I_3 = 0$       | 66.6666666667                  | 40.0           | 0.0                                  | 0.0           |

Table S2. Time improvement percentage and human errors reduction percentage obtained for all the figures of the main paper and the supplementary material.

|                     | Step                                                                                                                               | Time in seconds                                                                                                                                                                                                                                                                          |
|---------------------|------------------------------------------------------------------------------------------------------------------------------------|------------------------------------------------------------------------------------------------------------------------------------------------------------------------------------------------------------------------------------------------------------------------------------------|
| Real tests          | Computation time of the decision-making (applying our formalization)                                                               | The robot takes an average of 0.5s to choose the action to perform after knowing the state of the puzzle through the perception part.                                                                                                                                                    |
|                     | Time taken by the robot for the perception of the puzzle state                                                                     | The robot takes between 20s and 30s depending on how well the cubes are placed and how many cubes are left to assemble.                                                                                                                                                                  |
|                     | Time taken by the robot for doing a physical movement                                                                              | The robot takes on average 15s for doing a physical movement.                                                                                                                                                                                                                            |
|                     | Waiting time for the robot when it gives an indication for the human                                                               | The robot waits between 5s and 15s each time it gives an indication to the human, depending on its complexity (for example, to ask the human to remove a cube, the robot waits 5s, and to ask the human to take a certain cube and place it in a certain position, the robot waits 15s). |
|                     | Global time taken by the robot to perform an action                                                                                | It is between 20s and 60s, depending on the complexity of the movement (the number of cubes left to assemble at this iteration) and if the robot gives indications to the human. We considered that it was 60s.                                                                          |
|                     | Global time taken by the human to perform an action                                                                                | The human takes between 1s and 30s, depending on the complexity of the movement (if they know what to do or not). We considered that it was 20s.                                                                                                                                         |
| Tests in simulation | Time required for all probability distributions of possible human actions without printing the figures (such as Figures S2 and S3) | The Python code takes between 80s and 100s on a Dell laptop with an Intel Core i7 CPU and 32GB RAM.                                                                                                                                                                                      |

**Table S3.** Computation and execution times of the experiments in real and in simulation
